# Supplementary material for: Spike processing with a graphene excitable laser
Source: PubMed Central journal article supplement (PMC4709573; doi:10.1038/srep19126), 2016-01-12
Supplement: srep19126-s1.pdf [file srep19126-s1.pdf]

## Supplementary Information: Spike processing with a graphene excitable laser

B. J. Shastri,\* M. A. Nahmias,\* A. N. Tait,\* A. W. Rodriguez, B. Wu, and P. R. Prucnal†  
Department of Electrical Engineering, Princeton University, Princeton, New Jersey 08544, USA

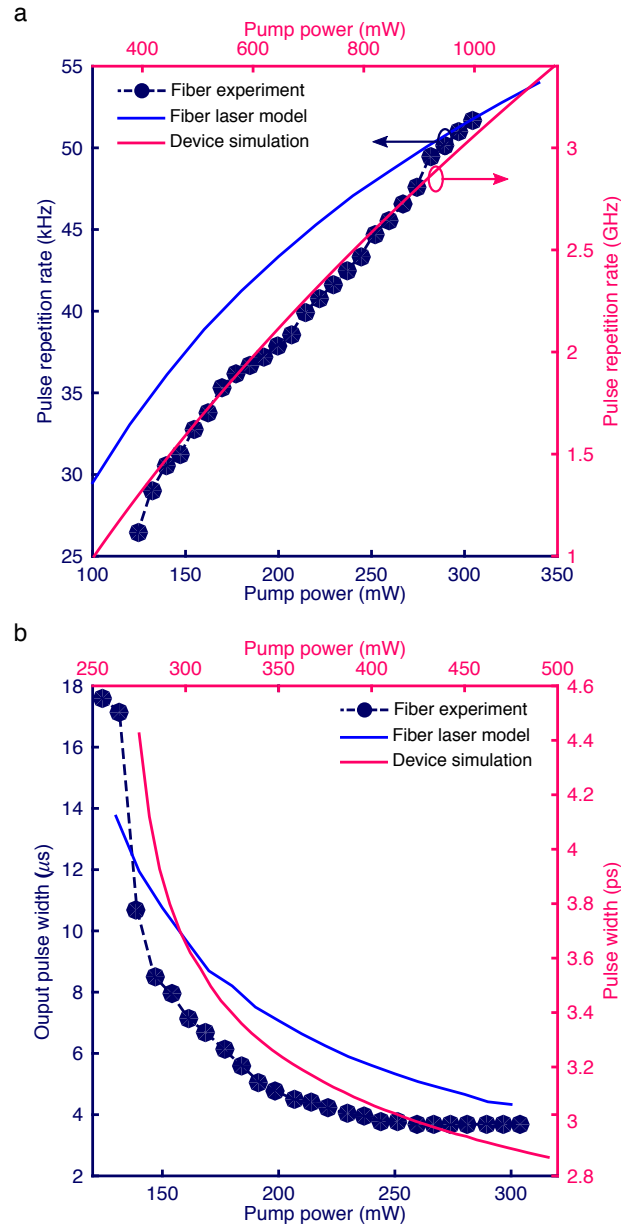

Supplementary Figure S 1. Typical characteristics of the passively Q-switched fiber and integrated lasers. (a) Output pulse repetition rate and (b) pulse width as a function of the pump current.

\* These authors contributed equally to this work.

† Correspondence and requests for materials should be addressed to B.J.S. (shastri@ieee.org) or P.R.P. (prucnal@princeton.edu)
